# Supplementary material
Source: PubMed Central journal article supplement (PMC3142883)
Supplement: NIHMS298856-supplement-1.pdf [file NIHMS298856-supplement-1.pdf]

## SUPPLEMENTAL MATERIAL

**Table 1: Data elements used in calculating hospital-level 30-day risk-adjusted mortality rates**

|                                              |
|----------------------------------------------|
| Age                                          |
| Female                                       |
| Heart failure                                |
| Arrhythmia                                   |
| Chronic obstructive pulmonary disease (COPD) |
| Fluid and electrolyte imbalance              |
| Renal failure                                |
| Neurological disease                         |
| Paralysis                                    |
| Liver disease                                |
| Lymphoma                                     |
| Metastatic cancer                            |
| Weight loss                                  |
| Dementia                                     |
| Coagulopathy                                 |
| AMI location anterior and lateral            |
| AMI location inferior and posterior          |
| AMI location other site                      |

**Table 2. Characteristics of Study HRRs**

| <b>Characteristic</b>                                                   | <b>Average</b> | <b>Range</b>    |
|-------------------------------------------------------------------------|----------------|-----------------|
| Hospitals admitting patients for AMI (median, range)                    | <b>16</b>      | <b>5-64</b>     |
| Hospitals providing coronary revascularization services (median, range) | <b>6</b>       | <b>1-33</b>     |
| Top 20% quality hospitals (median, range)                               | <b>3</b>       | <b>0-27</b>     |
| Bottom 20% quality hospitals (median, range)                            | <b>3</b>       | <b>0-15</b>     |
| Teaching hospitals (median, range)                                      | <b>2</b>       | <b>0-19</b>     |
| Safety net hospitals (median, range)                                    | <b>1</b>       | <b>0-13</b>     |
| For profit hospitals (median, range)                                    | <b>2</b>       | <b>0-19</b>     |
| Black and white patients admitted with AMI (mean, range)                | <b>900</b>     | <b>201-2858</b> |
| Black patients admitted with AMI (mean, range)                          | <b>99</b>      | <b>52-439</b>   |
